# Supplementary material for: APOL1 Genotype, Proteinuria, and the Risk of Kidney Failure: A Secondary Analysis of the AASK (African American Study of Kidney Disease and Hypertension) and CRIC (Chronic Renal Insufficiency Cohort) Studies
Source: PubMed Central journal article supplement — Kidney Med. 2022 Nov 1;4(12):100563. doi: 10.1016/j.xkme.2022.100563 (PMC9720339; doi:10.1016/j.xkme.2022.100563), 2022-11-01
Supplement: mmc1.pdf [file mmc1.pdf]

Table S1: Descriptive Statistics for AASK and CRIC Data Individually

| <b>AASK Data</b>                        | <b>Non-Black<br/>(N=0)</b>    |               | <b>Black without APOL1<br/>(N=424)</b>  |               | <b>Black with APOL1<br/>(N = 96)</b>  |               |
|-----------------------------------------|-------------------------------|---------------|-----------------------------------------|---------------|---------------------------------------|---------------|
|                                         | <b>#, Mean</b>                | <b>% (SD)</b> | <b>#, Mean</b>                          | <b>% (SD)</b> | <b>#, Mean</b>                        | <b>% (SD)</b> |
| <b>ESKD</b>                             |                               |               | 54                                      | 13%           | 28                                    | 29%           |
| <b>AGE</b>                              |                               |               | 54.7                                    | (9.9)         | 53.9                                  | (9.9)         |
| <b>SEX</b>                              |                               |               |                                         |               |                                       |               |
| Male                                    |                               |               | 266                                     | 62.7%         | 51                                    | 53.1%         |
| Female                                  |                               |               | 158                                     | 37.3%         | 45                                    | 46.9%         |
| <b>BASELINE PROTEINURIA LEVEL</b>       |                               |               |                                         |               |                                       |               |
| UPCR ≤ 0.220 mg/mg                      |                               |               | 319                                     | 75.2%         | 54                                    | 54.2%         |
| 0.220 mg/mg < UPCR ≤ 1 mg/mg            |                               |               | 70                                      | 16.5%         | 32                                    | 33.3%         |
| UPCR > 1 mg/mg                          |                               |               | 32                                      | 8.3%          | 12                                    | 12.5%         |
| <b>MEAN UPCR (mg/mg )</b>               |                               |               | 0.3                                     | (0.8)         | 0.5                                   | (0.9)         |
| <b>eGFR (cL/min/1.73 m<sup>2</sup>)</b> |                               |               | 38.5                                    | (14.6)        | 33.6                                  | (15.7)        |
| <b>DIABETES</b>                         |                               |               |                                         |               |                                       |               |
| Has Diabetes                            |                               |               | 424                                     | 100%          | 96                                    | 100%          |
| <b>CRIC Data</b>                        | <b>Non-Black<br/>(N=2911)</b> |               | <b>Black without APOL1<br/>(N=1146)</b> |               | <b>Black with APOL1<br/>(N = 278)</b> |               |
|                                         | <b>#, Mean</b>                | <b>% (SD)</b> | <b>#, Mean</b>                          | <b>% (SD)</b> | <b>#, Mean</b>                        | <b>% (SD)</b> |
| <b>ESKD</b>                             | 592                           | 20%           | 376                                     | 33%           | 124                                   | 45%           |
| <b>AGE</b>                              | 59.6                          | (11.1)        | 58.9                                    | (9.7)         | 54.0                                  | (12.7)        |
| <b>SEX</b>                              |                               |               |                                         |               |                                       |               |
| Male                                    | 1777                          | 61%           | 565                                     | 49.3%         | 132                                   | 47.5%         |
| Female                                  | 1134                          | 39%           | 581                                     | 50.7%         | 146                                   | 52.5%         |
| <b>BASELINE PROTEINURIA LEVEL</b>       |                               |               |                                         |               |                                       |               |
| UPCR ≤ 0.220 mg/mg                      | 1719                          | 59.1%         | 624                                     | 54.5%         | 112                                   | 40.3%         |
| 0.220 mg/mg < UPCR ≤ 1 mg/mg            | 621                           | 21.3%         | 262                                     | 22.9%         | 97                                    | 34.9%         |
| UPCR > 1 mg/mg                          | 571                           | 19.6%         | 260                                     | 22.7%         | 69                                    | 24.8%         |
| <b>MEAN UPCR (mg/mg )</b>               | 0.9                           | (2.3)         | 1.0                                     | (2.2)         | 1.1                                   | (2.1)         |
| <b>eGFR (cL/min/1.73 m<sup>2</sup>)</b> | 51.0                          | (16.2)        | 40.0                                    | (13.2)        | 40.8                                  | (14.5)        |
| <b>DIABETES</b>                         |                               |               |                                         |               |                                       |               |
| Has Diabetes                            | 1389                          | 47.7%         | 621                                     | 54.2%         | 114                                   | 41%           |
| <b>HISPANIC</b>                         |                               |               |                                         |               |                                       |               |
| Yes                                     | 541                           | 18.6%         | 7                                       | 0.6%          | 0                                     | 0%            |
| <b>HEALTH INSURANCE</b>                 |                               |               |                                         |               |                                       |               |
| None                                    | 176                           | 6%            | 56                                      | 4.9%          | 27                                    | 9.7%          |
| Medicare                                | 1070                          | 36.8%         | 371                                     | 32.4%         | 69                                    | 24.8%         |
| Medicaid / VA / Other                   | 355                           | 12.2%         | 313                                     | 27.3%         | 68                                    | 24.5%         |
| Private                                 | 546                           | 18.8%         | 133                                     | 11.6%         | 33                                    | 11.9%         |

|                                                   |      |       |     |       |     |        |
|---------------------------------------------------|------|-------|-----|-------|-----|--------|
| Unknown / Missing                                 | 764  | 26.2% | 273 | 23.8% | 81  | 29.1%  |
| <b>INCOME</b>                                     |      |       |     |       |     |        |
| \$20,000 or under                                 | 679  | 23.3% | 442 | 38.6% | 101 | 36.3%  |
| \$20,001 - \$50,000                               | 677  | 23.3% | 304 | 26.5% | 67  | 24.1%  |
| \$50,001 - \$100,000                              | 667  | 22.9% | 147 | 12.8% | 43  | 15.5%  |
| More than \$100,000                               | 503  | 17.3% | 48  | 4.2%  | 9   | 3.2%   |
| Unknown                                           | 385  | 13.2% | 205 | 17.9% | 58  | 20.9%  |
| <b>EDUCATION</b>                                  |      |       |     |       |     |        |
| Less than High School                             | 425  | 14.6% | 311 | 27.1% | 70  | 25.2%  |
| High School Graduate                              | 455  | 15.6% | 267 | 23.3% | 51  | 18.3%  |
| Some College                                      | 734  | 25.2% | 385 | 33.6% | 102 | 36.7%  |
| College Graduate or Higher                        | 1297 | 44.6% | 183 | 16%   | 55  | 19.8%  |
| <b>MARITAL STATUS</b>                             |      |       |     |       |     |        |
| Not Married                                       | 1018 | 35%   | 667 | 58.2% | 170 | 61.2%  |
| Married                                           | 1893 | 65%   | 479 | 41.8% | 108 | 38.8%  |
| <b>ANKLE BRACHIAL INDEX</b>                       |      |       |     |       |     |        |
| ABI ≤ 0.9                                         | 347  | 11.9% | 241 | 21%   | 43  | 15.5%  |
| 0.9 < ABI ≤ 1                                     | 483  | 16.6% | 270 | 23.6% | 65  | 23.4%  |
| ABI > 1                                           | 2081 | 71.5% | 635 | 55.4% | 170 | 61.2%  |
| <b>BMI</b>                                        |      |       |     |       |     |        |
| BMI < 25 kg/m <sup>2</sup>                        | 498  | 17.1% | 136 | 11.9% | 38  | 13.7%  |
| 25 kg/m <sup>2</sup> ≤ BMI < 30 kg/m <sup>2</sup> | 947  | 32.5% | 200 | 23.5% | 60  | 21.6%  |
| 30 kg/m <sup>2</sup> ≤ BMI < 40 kg/m <sup>2</sup> | 1161 | 39.9% | 535 | 46.7% | 124 | 44.6%  |
| BMI ≥ 40 kg/m <sup>2</sup>                        | 305  | 10.5% | 206 | 18%   | 56  | 20.1%  |
| <b>VISITED A NEPHROLOGIST</b>                     |      |       |     |       |     |        |
| Yes                                               | 1823 | 62.6% | 769 | 67.1% | 186 | 66.9%  |
| <b>DRINKING LAST 12 MONTHS</b>                    |      |       |     |       |     |        |
| Yes                                               | 2027 | 69.6% | 602 | 52.5% | 161 | 57.9%  |
| <b>MARIJUANA</b>                                  |      |       |     |       |     |        |
| Yes                                               | 997  | 34.2% | 402 | 35.1% | 111 | 39.9%  |
| <b>EVER USE DRUGS</b>                             |      |       |     |       |     |        |
| Marijuana Only                                    | 658  | 22.6% | 267 | 23.3% | 68  | 24.5%  |
| Cocaine, Heroin, or Speed                         | 366  | 12.6% | 144 | 12.6% | 45  | 16.2%  |
| No Drugs                                          | 1887 | 64.8% | 735 | 64.1% | 165 | 59.4%  |
| <b>CAUSE OF RENAL DISEASE</b>                     |      |       |     |       |     |        |
| Diabetes                                          | 706  | 24.3% | 327 | 28.5% | 52  | 18.7%  |
| Hypertension                                      | 338  | 11.6% | 231 | 20.2% | 71  | 25.25% |
| Other                                             | 533  | 18.3% | 82  | 7.2%  | 25  | 9%     |
| Don't Know                                        | 1334 | 45.8% | 506 | 44.2% | 130 | 46.8%  |
| <b>FAMILY HISTORY OF CAD</b>                      |      |       |     |       |     |        |

|                                 |      |       |      |       |     |       |
|---------------------------------|------|-------|------|-------|-----|-------|
| Yes                             | 382  | 13.1% | 169  | 14.7% | 36  | 12.9% |
| <b>FAMILY HISTORY OF RD</b>     |      |       |      |       |     |       |
| Yes                             | 329  | 11.3% | 244  | 21.3% | 73  | 26.3% |
| <b>CONGESTIVE HEART FAILURE</b> |      |       |      |       |     |       |
| Yes                             | 219  | 7.5%  | 162  | 14.1% | 28  | 10.1% |
| <b>STROKE</b>                   |      |       |      |       |     |       |
| Yes                             | 217  | 7.5%  | 173  | 15.1% | 31  | 11.2% |
| <b>CARDIO-VASCULAR DISEASE</b>  |      |       |      |       |     |       |
| Yes                             | 901  | 31%   | 461  | 40.2% | 90  | 32.4% |
| <b>ATRIAL FIBRILLATION</b>      |      |       |      |       |     |       |
| Yes                             | 454  | 15.6% | 247  | 21.6% | 38  | 13.7% |
| <b>HYPERTENSION</b>             |      |       |      |       |     |       |
| Yes                             | 2353 | 80.8% | 1062 | 92.7% | 263 | 94.6% |
| <b>ANEMIA</b>                   |      |       |      |       |     |       |
| Yes                             | 1098 | 37.7% | 655  | 57.2% | 145 | 52.2% |
| <b>DEPRESSION</b>               |      |       |      |       |     |       |
| Mild                            | 2442 | 83.9% | 965  | 84.2% | 231 | 83.1% |
| Moderate                        | 469  | 16.1% | 181  | 15.8% | 47  | 16.9% |

Table S2: Relevant Hazard Ratios from Sensitivity Analysis

Increased risk of ESKD for APOL1 patients (expressed as hazard ratios), stratified by proteinuria levels. No substantial differences are seen between any of the sensitivity scenarios tested. Risk of ESKD associated with having APOL1 is higher if proteinuria levels are lower. Details on the different eGFR versions can be found in the appendix (calculations C1-C7)

|                               |                                                     | <b>MINIMAL PROTEINURIA</b>  |               | <b>MODERATE PROTEINURIA</b>             |               | <b>HIGH PROTEINURIA</b>    |               |
|-------------------------------|-----------------------------------------------------|-----------------------------|---------------|-----------------------------------------|---------------|----------------------------|---------------|
|                               |                                                     | <b>Hazard Ratio</b>         | <b>95% CI</b> | <b>Hazard Ratio</b>                     | <b>95% CI</b> | <b>Hazard Ratio</b>        | <b>95% CI</b> |
| <b>Non Time-Varying Model</b> |                                                     | <i>(UPCR ≤ 0.220 mg/mg)</i> |               | <i>(0.22 mg/mg &lt; UPCR ≤ 1 mg/mg)</i> |               | <i>(UPCR &gt; 1 mg/mg)</i> |               |
| 1                             | Primary Analysis (eGFR = 2009 CKD-EPI_AS_NRF)**     | 1.87                        | [1.23, 2.84]  | 1.41                                    | [1.06, 1.87]  | 1.22                       | [0.93, 1.61]  |
| 2                             | eGFR = 2009 CKD-EPI_AS Equation**                   | 1.92                        | [1.27, 2.91]  | 1.41                                    | [1.06, 1.87]  | 1.22                       | [0.93, 1.61]  |
| 3                             | eGFR = 2012 CKD-EPI_AS_NRF Equation*                | 2.00                        | [1.26, 3.16]  | 1.37                                    | [1.00, 1.89]  | 1.24                       | [0.99, 1.66]  |
| 4                             | eGFR = 2012 CKD-EPI_AS Equation*                    | 2.03                        | [1.28, 3.21]  | 1.38                                    | [1.00, 1.89]  | 1.24                       | [0.92, 1.66]  |
| 5                             | Using Albuminuria Instead of Proteinuria**          | 3.01                        | [1.87, 4.57]  | 1.16                                    | [0.81, 1.65]  | 1.12                       | [0.85, 1.47]  |
| 6                             | Adjust for Biomedical Factors*                      | 1.80                        | [1.13, 2.86]  | 1.48                                    | [1.07, 2.03]  | 1.25                       | [0.93, 1.70]  |
| 7                             | Adjust for Sociodemographic Factors*                | 1.88                        | [1.18, 2.97]  | 1.31                                    | [0.95, 1.80]  | 1.19                       | [0.88, 1.60]  |
| 8                             | Adjust for Biomedical and Sociodemographic Factors* | 1.77                        | [1.12, 2.81]  | 1.43                                    | [1.03, 1.97]  | 1.23                       | [0.91, 1.67]  |
| <b>Time-Varying Model</b>     |                                                     | <i>(UPCR ≤ 0.220 mg/mg)</i> |               | <i>(0.22 mg/mg &lt; UPCR ≤ 1 mg/mg)</i> |               | <i>(UPCR &gt; 1 mg/mg)</i> |               |
| 9                             | Primary Analysis (eGFR = 2009 CKD-EPI_AS_NRF)**     | 2.04                        | [1.10, 3.77]  | 1.70                                    | [1.20, 2.40]  | 1.39                       | [1.11, 1.74]  |
| 10                            | eGFR = 2009 CKD-EPI_AS Equation**                   | 2.12                        | [1.15, 3.92]  | 1.70                                    | [1.20, 2.40]  | 1.38                       | [1.10, 1.73]  |
| 11                            | eGFR = 2012 CKD-EPI_AS_NRF Equation*                | 2.39                        | [1.25, 4.54]  | 1.79                                    | [1.22, 2.63]  | 1.28                       | [1.00, 1.63]  |
| 12                            | eGFR = 2012 CKD-EPI_AS Equation*                    | 2.44                        | [1.28, 4.64]  | 1.79                                    | [1.22, 2.63]  | 1.28                       | [1.00, 1.64]  |
| 13                            | Proteinuria as a continuous value**                 | 2.69                        | [1.32, 5.49]  | 1.90                                    | [1.38, 2.62]  | 1.60                       | [1.32, 1.94]  |
| 14                            | Using Albuminuria Instead of Proteinuria**          | 2.12                        | [0.96, 4.70]  | 1.57                                    | [1.13, 2.18]  | 1.38                       | [1.06, 1.79]  |
| 15                            | Adjust for Biomedical Factors*                      | 2.29                        | [1.20, 4.36]  | 1.76                                    | [1.19, 2.59]  | 1.41                       | [1.10, 1.81]  |
| 16                            | Adjust for Sociodemographic Factors*                | 2.24                        | [1.18, 4.27]  | 1.62                                    | [1.10, 2.39]  | 1.32                       | [1.03, 1.69]  |
| 17                            | Adjust for Biomedical and Sociodemographic Factors* | 2.23                        | [1.17, 4.25]  | 1.67                                    | [1.14, 2.47]  | 1.40                       | [1.09, 1.79]  |

\*\* CRIC and AASK studies both used (N = 4855)

\* CRIC study only (N = 4335)

Sensitivity Analysis Details: The following descriptions describe how each model differs from the primary analysis presented in the main manuscript. Sensitivity analysis results 1-8 reflect the non time-varying model sensitivity analysis while sensitivity analysis results 9-17 reflect the time-varying model sensitivity results.

- 1) Primary analysis for the non time-varying models. Estimates derived from a Cox proportional hazards model, adjusting for age, sex, diabetes, estimated glomerular filtration rate, and urine protein to creatinine ratio. This version uses the 2009 CKD-EPI\_AS\_NRF equation for eGFR.
- 2) Use the 2009 CKD-EPI\_AS equation for eGFR instead of the 2009 CKD-EPI\_AS\_NRF equation.
- 3) Use the 2012 CKD-EPI\_AS\_NRF equation for eGFR instead of the 2009 CKD-EPI\_AS\_NRF equation.
- 4) Use the 2012 CKD-EPI\_AS equation for eGFR instead of the 2009 CKD-EPI\_AS\_NRF equation.
- 5) Instead of using Proteinuria at baseline visit, use Albuminuria.
- 6) Adjust for additional biomedical factors including ankle brachial index, BMI, history of visiting a nephrologist, drinking in the last 12 months, marijuana, other drug use (cocaine, heroin, speed), cause of renal disease, family history of CAD, family history of RD, congestive heart failure, stroke, cardio-vascular disease, atrial fibrillation, hypertension, anemia, and depression.
- 7) Adjust for sociodemographic factors including Hispanic, health insurance, income, education, and marital status.
- 8) Adjust for all biomedical and sociodemographic characteristics specified in models 8 and 9.
- 9) Primary analysis for the time-varying models. Estimates derived from a Cox proportional hazards model, adjusting for age, sex, diabetes, estimated glomerular filtration rate, and urine protein to creatinine ratio. This version uses the 2009 CKD-EPI\_AS\_NRF equation for eGFR.
- 10) Use the 2009 CKD-EPI\_AS equation for eGFR instead of the 2009 CKD-EPI\_AS\_NRF equation.
- 11) Use the 2012 CKD-EPI\_AS\_NRF equation for eGFR instead of the 2009 CKD-EPI\_AS\_NRF equation.
- 12) Use the 2012 CKD-EPI\_AS equation for eGFR instead of the 2009 CKD-EPI\_AS\_NRF equation.
- 13) Instead of categorizing proteinuria into categorical levels, use the log of UPCR and incorporate proteinuria in the model as a continuous variable
- 14) Instead of using Proteinuria, use Albuminuria. Baseline albuminuria is recorded. Albuminuria over time is estimated using calculation C.7.
- 15) Adjust for additional biomedical factors including ankle brachial index, BMI, history of visiting a nephrologist, drinking in the last 12 months, marijuana, other drug use (cocaine, heroin, speed), cause of renal disease, family history of CAD, family history of RD, congestive heart failure, stroke, cardio-vascular disease, atrial fibrillation, hypertension, anemia, and depression.
- 16) Adjust for sociodemographic factors including Hispanic, health insurance, income, education, and marital status.
- 17) Adjust for all biomedical and sociodemographic characteristics specified in models 8 and 9.

## Item S1: Calculations for eGFR and UPCR to UACR

### Calculation C.1: eGFR Calculation: 2009 CKD-EPI\_ASR [1,2]

This calculation considers age, sex, race, and creatinine when fitting the equation to estimate eGFR. All variables are used using the calculation for estimation.

$$eGFR = A \times \left(\frac{Scr}{B}\right)^C \times 0.993^{age} \times (1.159 \text{ if black})$$

Where A, B, and C are the following:

#### Female

- Scr ≤ 0.7
  - A = 143.538
  - B = 0.7
  - C = -0.329
- Scr > 0.7
  - A = 143.538
  - B = 0.7
  - C = -1.209

#### Male

- Scr ≤ 0.9
  - A = 141
  - B = 0.9
  - C = -0.411
- Scr > 0.9
  - A = 141
  - B = 0.9
  - C = -1.209

## Calculation C.2: eGFR Calculation: 2009 CKD-EPI\_ASR\_NB [1,2]

This calculation considers age, sex, race, and creatinine when fitting the equation to estimate eGFR. However, the race variable is not used when using the calculation for estimation.

$$eGFR = A \times \left(\frac{Scr}{B}\right)^C \times 0.993^{age}$$

Where A, B, and C are the following:

Female

- Scr ≤ 0.7
  - A = 143.538
  - B = 0.7
  - C = -0.329
- Scr > 0.7
  - A = 143.538
  - B = 0.7
  - C = -1.209

Male

- Scr ≤ 0.9
  - A = 141
  - B = 0.9
  - C = -0.411
- Scr > 0.9
  - A = 141
  - B = 0.9
  - C = -1.209

### Calculation C.3: eGFR Calculation: 2009 CKD-EPI\_AS\_NRF [2]

This calculation considers age, sex, and creatinine when fitting the equation to estimate eGFR. Race is excluded when fitting this equation. Age, sex, and creatinine are all used when estimating eGFR with this equation

$$eGFR = A \times \left(\frac{Scr}{B}\right)^C \times 0.9938^{age}$$

Where A, B, and C are the following

#### Female

- Scr ≤ 0.7
  - A = 143.7
  - B = 0.7
  - C = -0.241
- Scr > 0.7
  - A = 143.7
  - B = 0.7
  - C = -1.200

#### Male

- Scr ≤ 0.9
  - A = 142
  - B = 0.9
  - C = -0.302
- Scr > 0.9
  - A = 142
  - B = 0.9
  - C = -1.200



## Calculation C.4: eGFR Calculation: 2012 CKD-EPI\_ASR [2]

This calculation considers age, sex, race, creatinine, and cystatin C when fitting the equation to estimate eGFR. All variables are used using the calculation for estimation.

$$eGFR = A \times \left(\frac{Scr}{B}\right)^C \times \left(\frac{CysC}{0.8}\right)^D 0.9952^{age} \times (1.08 \text{ if black})$$

Where A, B, and C are the following:

### Female

- Scr  $\leq$  0.7 and Cys C  $\leq$  0.8
  - A = 130.815
  - B = 0.7
  - C = -0.248
  - D = -0.375
- Scr  $>$  0.7 and Cys C  $\leq$  0.8
  - A = 130.815
  - B = 0.7
  - C = -0.601
  - D = -0.375
- Scr  $\leq$  0.7 and Cys C  $>$  0.8
  - A = 130.815
  - B = 0.7
  - C = -0.248
  - D = -0.711
- Scr  $>$  0.7 and Cys C  $>$  0.8
  - A = 130.815
  - B = 0.7
  - C = -0.601
  - D = -0.711

### Male

- Scr  $\leq$  0.9 and Cys C  $\leq$  0.8
  - A = 135
  - B = 0.9
  - C = -0.207
  - D = -0.375
- Scr  $>$  0.9 and Cys C  $\leq$  0.8
  - A = 135
  - B = 0.9
  - C = -0.601
  - D = -0.375
- Scr  $\leq$  0.9 and Cys C  $>$  0.8
  - A = 135
  - B = 0.9
  - C = -0.207
  - D = -0.711
- Scr  $>$  0.9 and Cys C  $>$  0.8
  - A = 135
  - B = 0.9
  - C = -0.601
  - D = -0.711

## Calculation C.5: eGFR Calculation: 2012 CKD-EPI\_ASR\_NB [2]

This calculation considers age, sex, race, creatinine, and cystatin C when fitting the equation to estimate eGFR. However, the race variable is not used when using the calculation for estimation.

$$eGFR = A \times \left(\frac{Scr}{B}\right)^C \times \left(\frac{CysC}{0.8}\right)^D 0.9952^{age}$$

Where A, B, and C are the following:

### Female

- Scr ≤ 0.7 and Cys C ≤ 0.8
  - A = 130.815
  - B = 0.7
  - C = -0.248
  - D = -0.375
- Scr > 0.7 and Cys C ≤ 0.8
  - A = 130.815
  - B = 0.7
  - C = -0.601
  - D = -0.375
- Scr ≤ 0.7 and Cys C > 0.8
  - A = 130.815
  - B = 0.7
  - C = -0.248
  - D = -0.711
- Scr > 0.7 and Cys C > 0.8
  - A = 130.815
  - B = 0.7
  - C = -0.601
  - D = -0.711

### Male

- Scr ≤ 0.9 and Cys C ≤ 0.8
  - A = 135
  - B = 0.9
  - C = -0.207
  - D = -0.375
- Scr > 0.9 and Cys C ≤ 0.8
  - A = 135
  - B = 0.9
  - C = -0.601
  - D = -0.375
- Scr ≤ 0.9 and Cys C > 0.8
  - A = 135
  - B = 0.9
  - C = -0.207
  - D = -0.711
- Scr > 0.9 and Cys C > 0.8
  - A = 135
  - B = 0.9
  - C = -0.601
  - D = -0.711

## Calculation C.6: eGFR Calculation: 2012 CKD-EPI\_AS\_NRF [2]

This calculation considers age, sex, race, creatinine, and cystatin C when fitting the equation to estimate eGFR. However, the race variable is not used when using the calculation for estimation.

$$eGFR = A \times \left(\frac{Scr}{B}\right)^C \times \left(\frac{CysC}{0.8}\right)^D 0.9961^{age}$$

Where A, B, and C are the following:

### Female

- Scr ≤ 0.7 and Cys C ≤ 0.8
  - A = 130.005
  - B = 0.7
  - C = -0.219
  - D = -0.323
- Scr > 0.7 and Cys C ≤ 0.8
  - A = 130.005
  - B = 0.7
  - C = -0.544
  - D = -0.323
- Scr ≤ 0.7 and Cys C > 0.8
  - A = 130.005
  - B = 0.7
  - C = -0.219
  - D = -0.778
- Scr > 0.7 and Cys C > 0.8
  - A = 130.005
  - B = 0.7
  - C = -0.544
  - D = -0.778

### Male

- Scr ≤ 0.9 and Cys C ≤ 0.8
  - A = 135
  - B = 0.9
  - C = -0.144
  - D = -0.323
- Scr > 0.9 and Cys C ≤ 0.8
  - A = 135
  - B = 0.9
  - C = -0.544
  - D = -0.323
- Scr ≤ 0.9 and Cys C > 0.8
  - A = 135
  - B = 0.9
  - C = -0.144
  - D = -0.778
- Scr > 0.9 and Cys C > 0.8
  - A = 135
  - B = 0.9
  - C = -0.544
  - D = -0.778

## Calculation C.7: UPCR to UACR Approximation Equation [3]

The following equation, can be used to approximate urine albumin to creatinine ratio (UACR) using urine protein to creatinine ratio (UPCR) in mg/g. We used this equation determine cutoffs for three categorical albuminuria levels (minimal, moderate, and severe) used in our sensitivity analysis. The selected cutoffs for the criteria were UPCR of 220 mg/g and 1000 mg/g which align with UACR of approximately 60 mg/g and 80 mg/g respectively.

Sumida K, Nadkarni GN, Grams ME, et al. Conversion of Urine Protein-Creatinine Ratio or Urine Dipstick Protein to Urine Albumin-Creatinine Ratio for Use in Chronic Kidney Disease Screening and Prognosis: An Individual Participant-Based Meta-analysis. *Ann Intern Med* 2020; 173: 426–435.

*Predicted UACR*

$$\begin{aligned} &= \exp\left(5.392 + 0.3072 \times \log\left(\min\left(\frac{UPCR}{50}, 1\right)\right)\right) \\ &+ 1.5793 \times \log\left(\max\left(\min\left(\frac{UPCR}{500}, 1\right), 0.1\right)\right) \\ &+ 1.1266 \times \log\left(\max\left(\frac{UPCR}{500}, 1\right)\right) \end{aligned}$$

## References

- [1] Levey AS, Stevens LA. Estimating GFR Using the CKD Epidemiology Collaboration (CKD-EPI) Creatinine Equation: More Accurate GFR Estimates, Lower CKD Prevalence Estimates, and Better Risk Predictions. *Am J Kidney Dis* 2010; 55: 622–627.
- [2] Inker LA, Eneanya ND, Coresh J, et al. New Creatinine- and Cystatin C–Based Equations to Estimate GFR without Race. *N Engl J Med* 2021; 385: 1737–1749.
- [3] Sumida K, Nadkarni GN, Grams ME, et al. Conversion of Urine Protein-Creatinine Ratio or Urine Dipstick Protein to Urine Albumin-Creatinine Ratio for Use in Chronic Kidney Disease Screening and Prognosis : An Individual Participant-Based Meta-analysis. *Ann Intern Med* 2020; 173: 426–435.
